# Supplementary material for: On the benefits of the tryptophan metabolite 3-hydroxyanthranilic acid in Caenorhabditis elegans and mouse aging
Source: PubMed Central journal article supplement (PMC10721613; doi:10.1038/s41467-023-43527-1), 2023-12-14
Supplement: 41467_2023_43527_MOESM3_ESM.pdf [file 41467_2023_43527_MOESM3_ESM.pdf]

## **Description of Additional Supplementary Files**

**Supplementary Data 1:** Contains summary statistics for all experiments outlined in the Results, Figures, and Supplementary Figures, RNAi clones used in this work, and *Caenorhabditis elegans* strains used in this work.
